# Supplementary material
Source: PubMed Central journal article supplement (PMC3346657)
Supplement: supp_56.5.2259_AAC5993-11_SF1.pdf [file supp_56.5.2259_AAC5993-11_SF1.pdf]

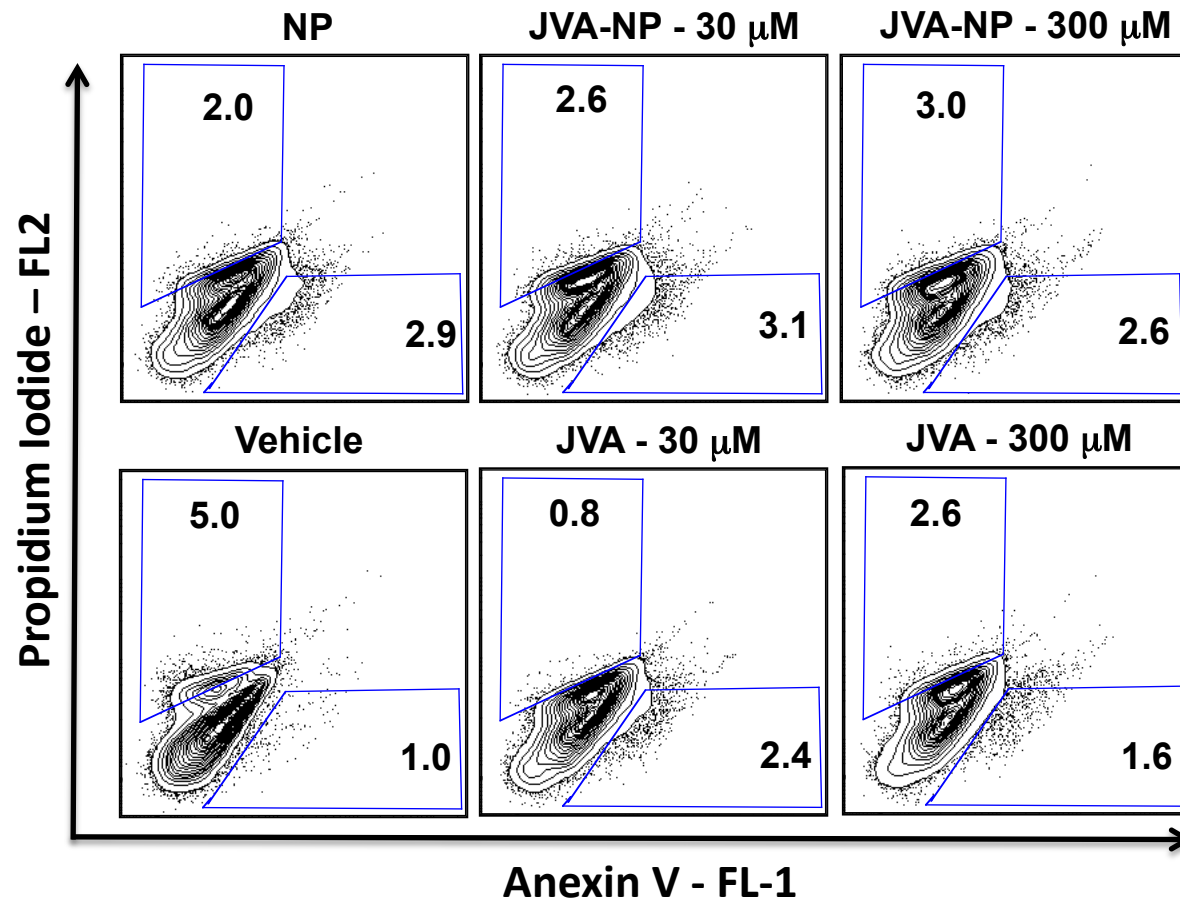

**Supplementary data S1. Frequencies of Annexin V/Propidium iodide-stained macrophages treated with JVA-NP vs soluble JVA.** Bone marrow-derived macrophages were cultured in the presence or absence of NP, blank-nanoparticles; JVA-NP or soluble JVA for 2 days. After that, cells were exposed to Annexin V-FITC following manufacturer's protocol (eBioscience). Apoptotic cells are defined as AV+ events and necrotic cells as PI+AV- events. Similar results were observed in 5-day cultures.
